# Supplementary material for: Sensitivity and Selectivity of Fluorescent Chemosensor for the Detection of Fe 3+ and its Cell Images
Source: Research Square preprint supplement (doi:10.21203/rs.3.rs-1563804/v1), 2022-04-28
Supplement: Supplementary file 1 [file 52b497f564fb46384fc0d0e6.doc]

**Novelty Statement**

- Here, we have synthesized new chemosensor based on the quinoline and nicotine hydrazide Schiff base.
- The synthesized chemosensor was effectively detecting Fe3+ in fluorometrically and “turn off”.
- The binding modes of probes L1 with Fe3+ ion were investigated by UV-vis, fluorescence.
- The sensing mechanism was clearly exposed *via* DFT studies.
- Finally, this chemosensor was successfully utilized in live cell imaging in HeLa cell lines.
